# Supplementary material
Source: Springer Nature journal article supplement (https://www.springermedizin.de/resource/supplementary/13000_2011_526_MOESM2_ESM.pdf/9624912)

# Lung adenocarcinoma n=559

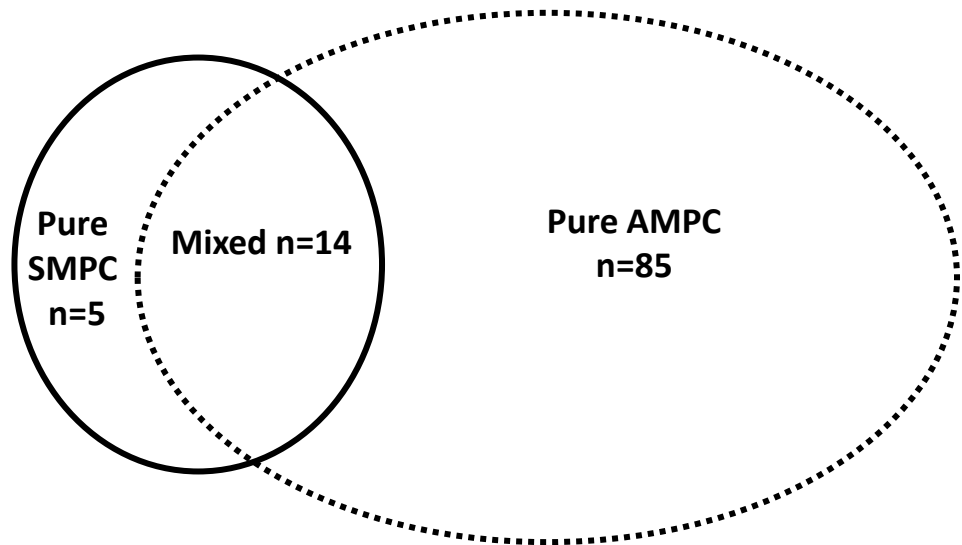

Supplement: MOESM2 [file 9624912]
